# Supplementary material for: Synergistic effect of graphene and silicon dioxide hybrids through hydrogen bonding self-assembly in elastomer composites
Source: Royal Society of Chemistry journal article supplement (doi:10.1039/c8ra01659c), 2018-01-01
Supplement: c8ra01659c1.pdf [file c8ra01659c1.pdf]

## Supporting information

### Synergistic effect of graphene and silicon dioxide hybrids through hydrogen bonding self-assembly in elastomer composites

Shuai Zhao\*, Shicheng Xie, Peipei Sun, Zheng Zhao, Lin Li\*, Xiaoming Shao, Xiaolin Liu, Zhenxiang Xin

Table S1 Thermal conductivity raw data for GS@NR and HGS@NR

nanocomposites

| Shot number | Temperature (°C) | Thermal Conductivity(W/m*K) |
|-------------|------------------|-----------------------------|
| GS@NR       | 30.4             | 0.160                       |
|             | 30.0             | 0.165                       |
|             | 29.8             | 0.158                       |
|             | 30.0             | 0.156                       |
|             | 30.1             | 0.157                       |
| Mean        | 30.1             | 0.159                       |
| H1GS@NR     | 29.7             | 0.162                       |
|             | 30.0             | 0.165                       |
|             | 30.1             | 0.172                       |
|             | 30.0             | 0.177                       |
|             | 30.0             | 0.160                       |
| Mean        | 30.0             | 0.167                       |
| H2GS@NR     | 29.9             | 0.165                       |
|             | 30.1             | 0.187                       |
|             | 30.0             | 0.158                       |
|             | 30.1             | 0.170                       |
|             | 30.1             | 0.167                       |
| Mean        | 30.0             | 0.169                       |
| H3GS@NR     | 29.7             | 0.204                       |
|             | 30.1             | 0.160                       |
|             | 30.1             | 0.184                       |
|             | 30.0             | 0.164                       |
|             | 30.0             | 0.161                       |
| Mean        | 30.0             | 0.175                       |
| GS@NR       | 149.8            | 0.185                       |
|             | 149.9            | 0.187                       |
|             | 150.1            | 0.186                       |

|         |       |       |
|---------|-------|-------|
|         | 150.0 | 0.180 |
|         | 150.1 | 0.177 |
| Mean    | 150.0 | 0.183 |
| H1GS@NR | 149.9 | 0.164 |
|         | 149.7 | 0.200 |
|         | 150.0 | 0.197 |
|         | 150.1 | 0.189 |
|         | 150.1 | 0.185 |
| Mean    | 150.0 | 0.187 |
| H2GS@NR | 150.0 | 0.195 |
|         | 150.1 | 0.204 |
|         | 150.0 | 0.185 |
|         | 150.1 | 0.191 |
|         | 150.1 | 0.190 |
| Mean    | 150.0 | 0.193 |
| H3GS@NR | 150.1 | 0.231 |
|         | 150.0 | 0.196 |
|         | 150.0 | 0.193 |
|         | 150.0 | 0.210 |
|         | 150.0 | 0.187 |
| Mean    | 150.0 | 0.203 |
